# Supplementary material
Source: HighWire-hosted journal article supplement (http://dmd.aspetjournals.org/highwire/filestream/66312/field_highwire_adjunct_files/0/Supplemental_Data_53876.pdf)
Supplement: Supplemental_Data_53876.pdf [file Supplemental_Data_53876.pdf]

## Negative Regulation of the UGT2B7 Enzyme by C-Terminally Truncated Proteins Derived from Alternative Splicing

Vincent Ménard, Pierre Collin, Guillaume Margailan and Chantal Guillemette

### Supplemental Figure 1

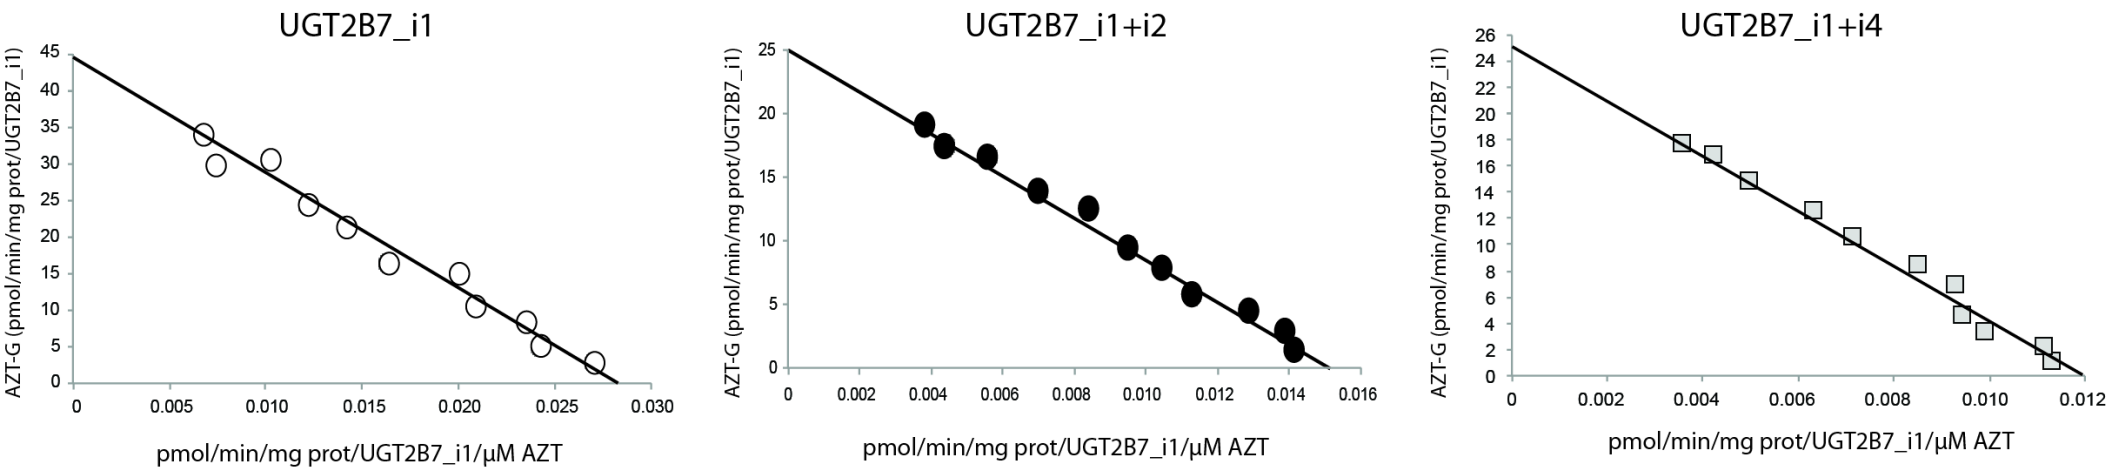

### Supplemental Figure 1 - Eadie-Hofstee plots of UGT2B7 glucuronidation assays.

Glucuronidation reaction assays using different concentrations of the substrate (AZT) were performed (see Fig. 6A for the graphical representation of the results). Here, data were transformed to plot the AZT-G production (in pmol/min/mg prot/ UGT2B7\_i1) with the AZT-G production/AZT concentration, thus producing Eadie-Hofstee plots. Coupled with the aspect of the glucuronidation kinetic curves, the linearity and the aspect of the curves obtained further prove that the enzymatic reaction is well fitted by the Michaelis-Menten equation.

**Negative regulation of the UGT2B7 enzyme by C-terminally truncated proteins derived from alternative splicing**

Vincent Ménard, Pierre Collin, Guillaume Margaillan and Chantal Guillemette

**SUPPLEMENTAL TABLE 1**

**Amplification strategies for RT-PCRs and quantitative real-time PCRs of UGT2B7.**

| Target                        | Primer | Sense | Sequence (5'-3')           | Final primer concentration (nM) | Amplicon length (bp) |
|-------------------------------|--------|-------|----------------------------|---------------------------------|----------------------|
| <b>UGT2B7 – RT-PCR</b>        |        |       |                            |                                 |                      |
| v1                            | 1568   | F     | GTGCTTACTTTGACTTTTGGTTTCG  | 1000                            | 791                  |
|                               | 2700   | R     | TAAACACCTTCGGGTTGCAGC      | 1000                            |                      |
| v5                            | 1568   | F     | GTGCTTACTTTGACTTTTGGTTTCG  | 1000                            | 736                  |
|                               | 2745   | R     | GAAGAAGCTGCTAAACTGTCTTCC   | 1000                            |                      |
| v7                            | 1568   | F     | GTGCTTACTTTGACTTTTGGTTTCG  | 1000                            | 461                  |
|                               | 2467   | R     | CTTCTAGATATAAAGAGAATGTTATG | 1000                            |                      |
| <b>UGT2B7 – qRT-PCR</b>       |        |       |                            |                                 |                      |
| ex4-ex6a                      | 3766   | F     | CTGCCTAAGGAAATGGAAGAC      | 800                             | 248                  |
|                               | 2467   | R     | CTTCTAGATATAAAGAGAATGTTATG | 800                             |                      |
| ex5-ex6b                      | 3137   | F     | CAGACTTGCTGAATGCATTGAAGAG  | 450                             | 79                   |
|                               | 3421   | R     | GTGGAATTGCTGCTTCATGTGG     | 300                             |                      |
| ex5-ex6a                      | 2699   | F     | CATTGCTCACATGAAGGCCAG      | 300                             | 234                  |
|                               | 2700   | R     | TAAACACCTTCGGGTTGCAGC      | 300                             |                      |
| <b>36B4 (RPLP0) – qRT-PCR</b> |        |       |                            |                                 |                      |
| ex4-ex5                       | 75     | F     | CCCATGTGAAGTCACTGTGC       | 125                             | 251                  |
|                               | 76     | R     | CAATGGCAGCATCTACAACC       | 125                             |                      |

Ex: Exon; F: forward; R: reverse; RPLP0: Ribosomal Protein Large P0
